# Supplementary material for: Online 2D Fluorescence Monitoring in Microtiter Plates Allows Prediction of Cultivation Parameters and Considerable Reduction in Sampling Efforts for Parallel Cultivations of Hansenula polymorpha
Source: Bioengineering (Basel). 2022 Sep 4;9(9):438. doi: 10.3390/bioengineering9090438 (PMC9495725; doi:10.3390/bioengineering9090438)
Supplement: Supplementary file 1 [file bioengineering-09-00438-s001.zip]

Archive with 10 entries (10 files):
- bioengineering-1872767-supplementary.pdf
- SuppS1.tif
- SuppS2.tif
- SuppS3.TIF
- SuppS4.tif
- SuppS5.tif
- SuppS6.tif
- SuppS7.tif
- SuppS8.tif
- SuppS9.tif
